# Supplementary material
Source: publisher figshare collection journal article supplement (https://gsajournals.figshare.com/ndownloader/files/23187056)
Supplement: Supplementary file 1 [file 23187056]

|  | **Summary** | **Complete** | **Fragmented** | **Missing** |
| --- | --- | --- | --- | --- |
| *Bembidion* sp.nr. transversale DNA3229 | C:85.0%[S:50.8%,D:34.2%],F:10.8%,M:4.2%,n:2442 | 2077 | 264 | 101 |
| *Bembidion lividulum* DNA4279 | C:79.5%[S:61.1%,D:18.4%],F:11.6%,M:8.9%,n:2442 | 1941 | 283 | 218 |
| *Chlaenius sericeus* JMPR007 | C:81.5%[S:64.6%,D:16.9%],F:9.6%,M:8.9%,n:2442 | 1990 | 234 | 218 |
| *Lionepha casta* DNA4602 | C:84.4%[S:57.5%,D:26.9%],F:10.5%,M:5.1%,n:2442 | 2063 | 257 | 122 |
| *Pterostichus melanarius* DNA4765 | C:90.1%[S:53.8%,D:36.3%],F:5.1%,M:4.8%,n:2442 | 2201 | 125 | 116 |
| *Trachypachus gibbsii* DNA4436 | C:87.1%[S:61.5%,D:25.6%],F:8.0%,M:4.9%,n:2442 | 2127 | 196 | 119 |

Table S7. Results of BUSCO analysis on six transcriptome assemblies using the 2442 gene Endopterygota odb9 reference set. See caption of Table 3 for additional explanation.
